# Supplementary material for: Vacancy-induced modulation of the interfacial properties of Au25(SCH3)18 nanoclusters supported on defective graphene
Source: Royal Society of Chemistry journal article supplement (doi:10.1039/d5nr00054h), 2025-01-01
Supplement: d5nr00054h1.pdf [file d5nr00054h1.pdf]

## Supporting Information

### Vacancy-Induced Modulation on the Interface Properties of $\text{Au}_{25}(\text{SCH}_3)_{18}$ Nanoclusters Supported on Defective Graphene

Pan Zhu, Yuping Chen and Qing Tang\*

School of Chemistry and Chemical Engineering, Chongqing Key Laboratory of Chemical Theory and Mechanism, Chongqing University, Chongqing 401331, China

\*To whom correspondence should be addressed.

E-mail: qingtang@cqu.edu.cn

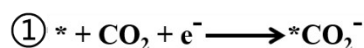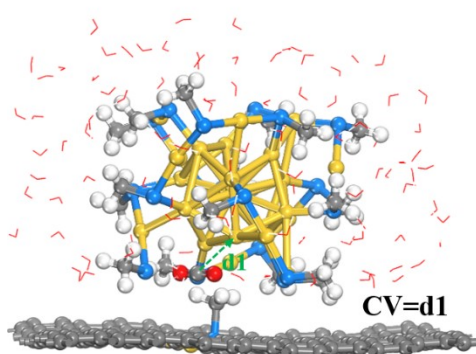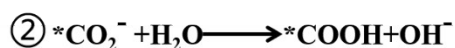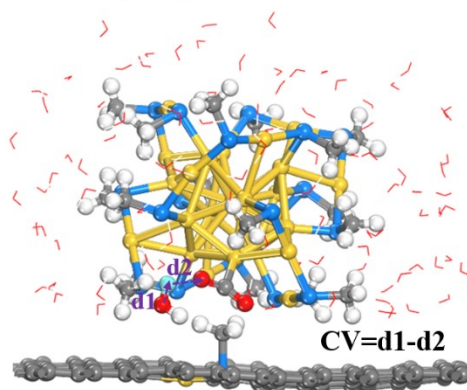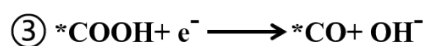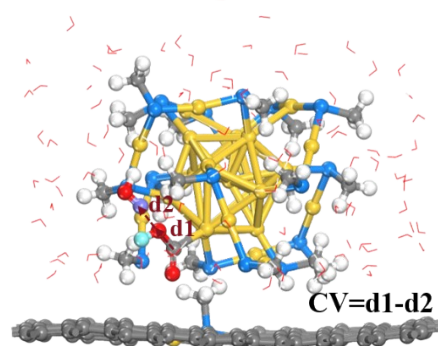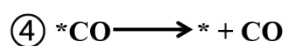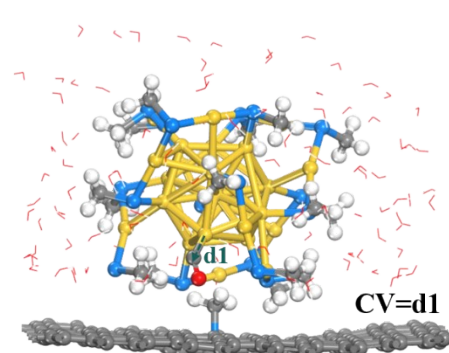

Figure S1. After performing AIMD simulation on  $\text{Au}_{25}\text{-GV}_6\text{-1}$ , the defined reaction collective variable (CV) for  $\text{CO}_2$  reduction process ( $\text{CO}_2$  activation,  $* \text{CO}_2$  to  $* \text{COOH}$ ,  $* \text{COOH}$  to  $* \text{CO}$  and  $\text{CO}$  desorption) in the system.

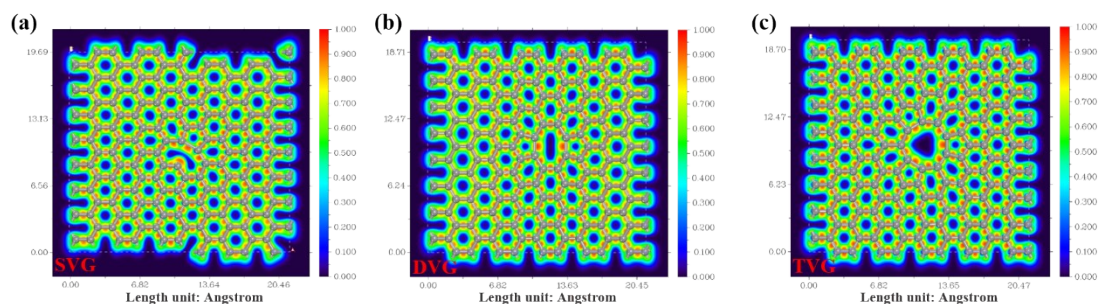

Figure S2. The ELF analysis on the electronic distribution of SVG (a), DVG (b), and TVG (c).

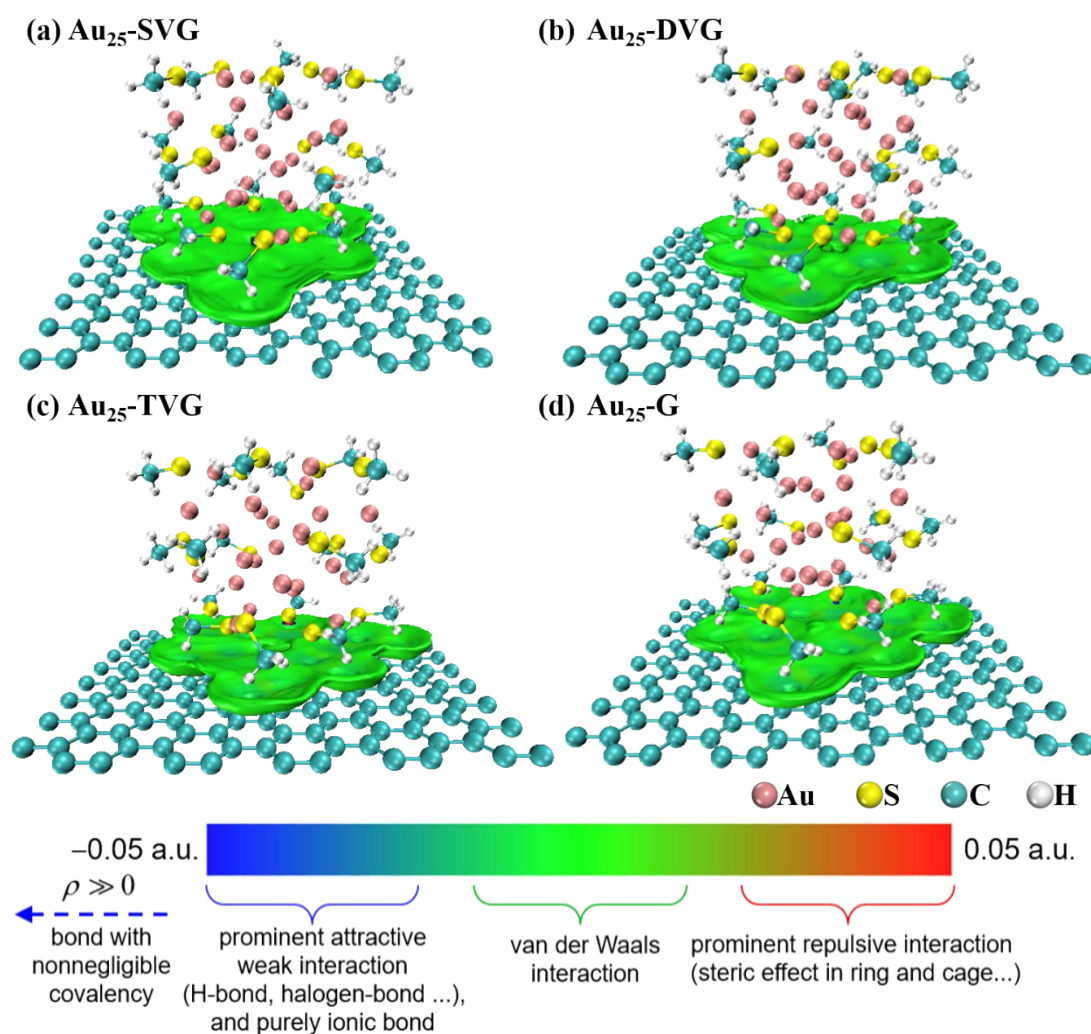

Figure S3. The IGMH method visualization reveals the weak interaction between  $\text{Au}_{25}$  and SVG (a), DVG (b), TVG (c), and pristine graphene (d).

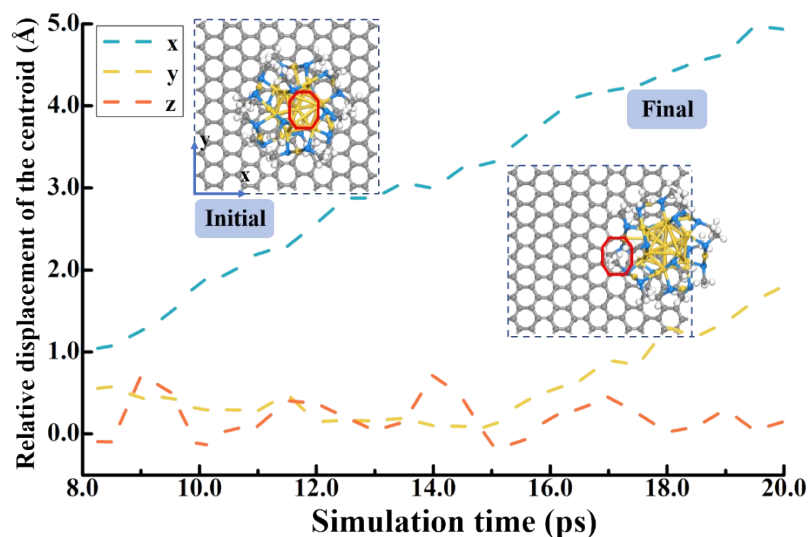

Figure S4. Displacement of  $\text{Au}_{25}$  NC on DVG from 8ps to 20ps at 300 K along the direction of x, y, and z axes, respectively. The AIMD snapshots of the initial and final states are shown on the inset.

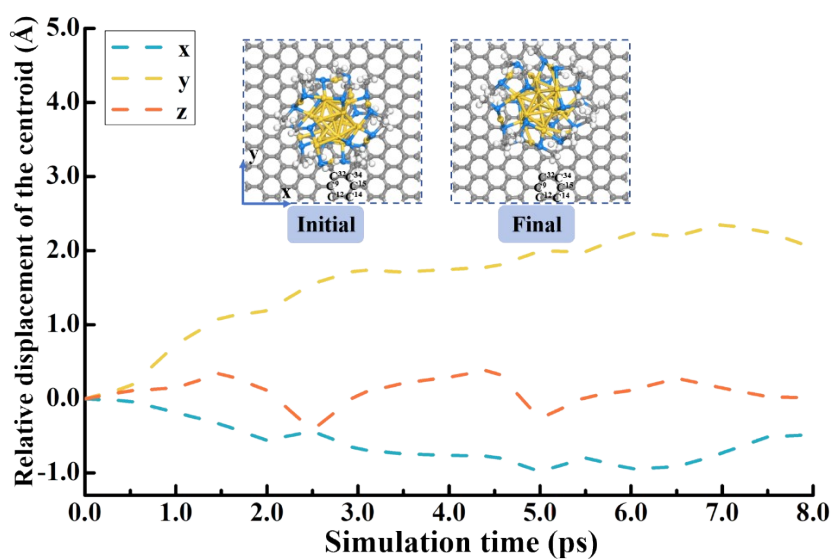

Figure S5. Displacement of  $\text{Au}_{25}$  NC on the pristine graphene along the direction of x, y, and z axes, respectively. The AIMD snapshots of the initial and final states are shown inset.

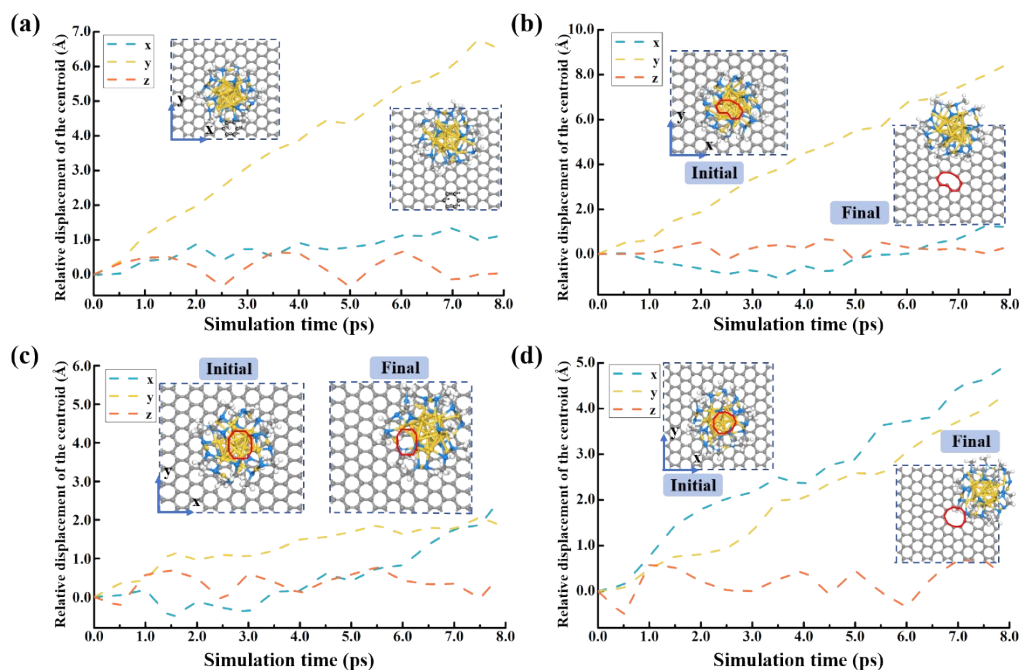

Figure S6. Displacement of  $\text{Au}_{25}$  NC on pristine graphene (a), SVG (b), DVG (c), and TVG (d) along the direction of x, y, and z axes within 8ps AIMD simulations at 600K. The AIMD snapshots of the initial and final states are shown inset.

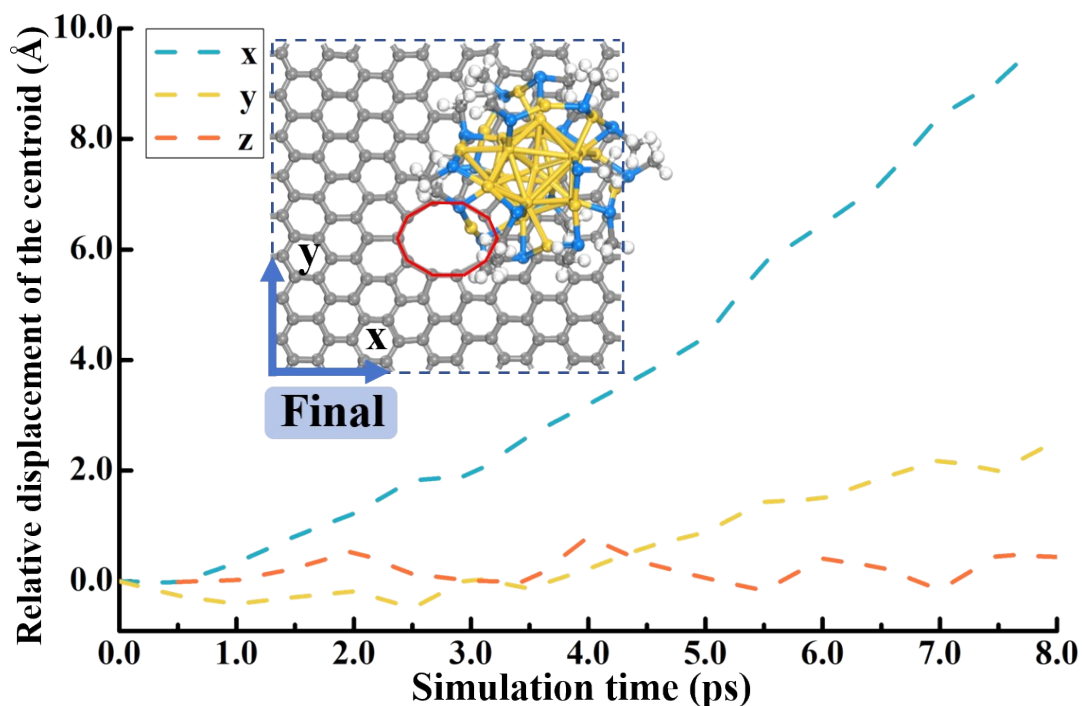

Figure S7. Displacement of  $\text{Au}_{25}$  NC on GV<sub>6-2</sub> along the direction of x, y, and z axes at 600K. The AIMD snapshot of the final state after 8 ps simulations is shown inset.

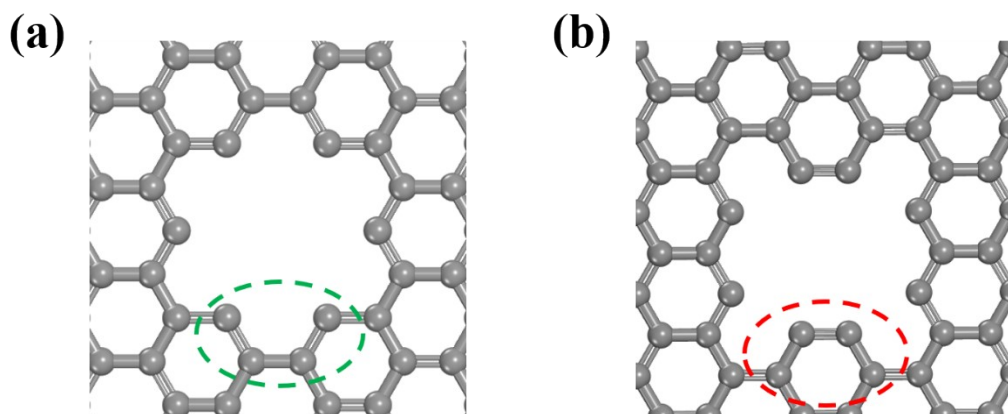

Figure S8. Vacancy edge structure of graphene substrates with six missing C atoms: initial structure of GV<sub>6</sub>-1(a) and GV<sub>6</sub>-2 (b).

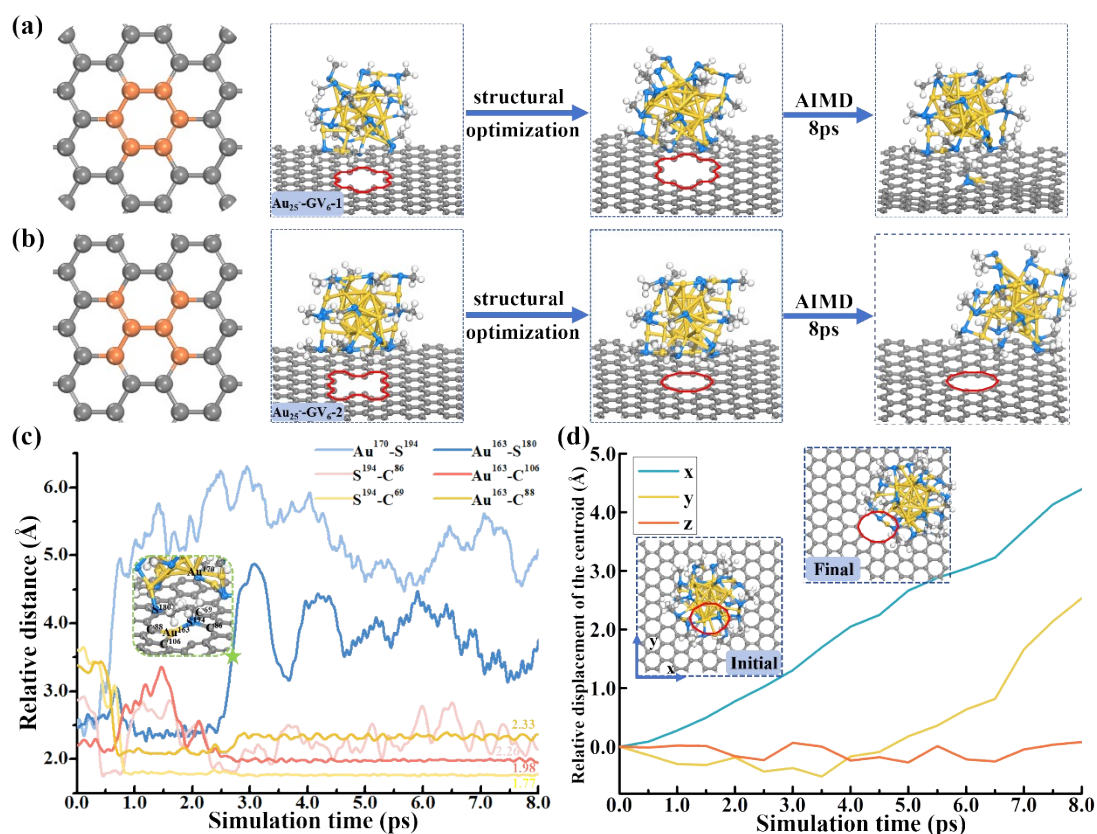

Figure S9. The structural model of Au<sub>25</sub><sup>-</sup> NC loaded on GV<sub>6</sub>-1 (a) and GV<sub>6</sub>-2 (b), displaying the optimized structure and the corresponding AIMD snapshots after 8ps simulations at 300K, the highlighted orange C atoms in the left column of (a) and (b) shows the six missing C sites in graphene. (c) Statistics of the relative distance between

the denoted key atoms during the equilibrated AIMD simulations of  $\text{Au}_{25}^+-\text{GV}_6-1$  system. (d) The displacement of  $\text{Au}_{25}^+$  NC on  $\text{GV}_6-2$  along the x, y, and z axes, respectively, wherein the initial and final structures after 8ps AIMD simulations are shown inset.

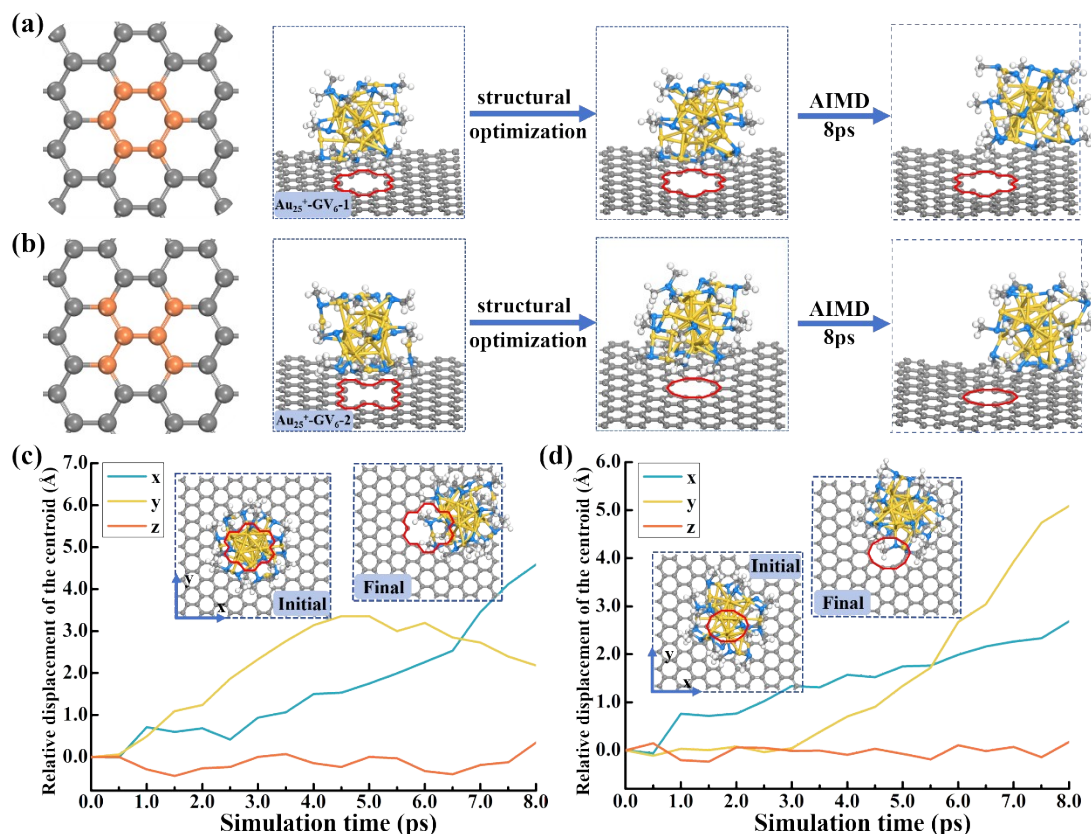

Figure S10. The structural model of  $\text{Au}_{25}^+$  NC loaded on  $\text{GV}_6-1$  (a) and  $\text{GV}_6-2$  (b), displaying the optimized structure and the corresponding AIMD snapshots after 8ps simulations at 300K, the highlighted orange C atoms in the left column of (a) and (b) shows the six missing C sites in graphene. The displacement of  $\text{Au}_{25}^+$  NC on (c)  $\text{GV}_6-1$  and (d)  $\text{GV}_6-2$  along the x, y, and z axes, respectively, wherein the initial and final structures after 8ps AIMD simulations are shown inset.

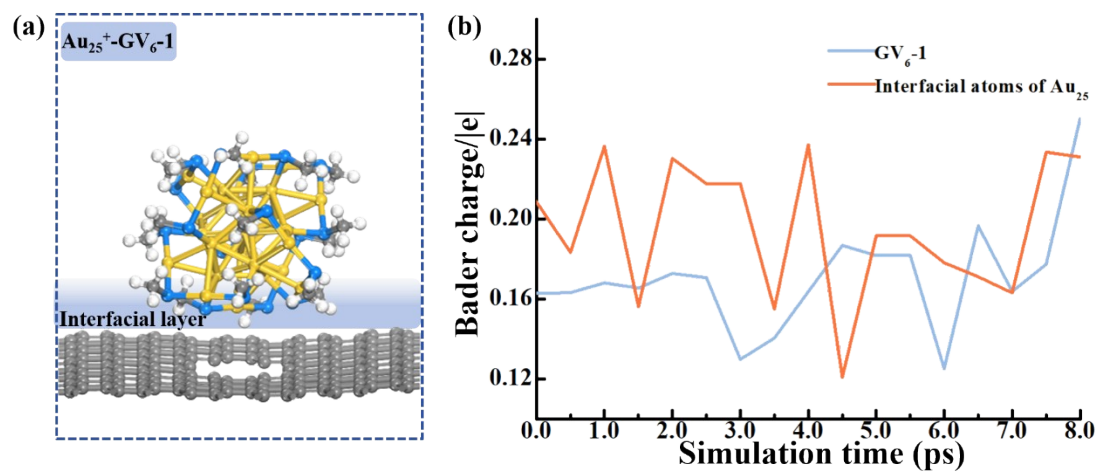

Figure S11. (a) The theoretical model of the  $\text{Au}_{25}^+ \text{-GV}_6\text{-1}$  system, where the blue-shaded region represents the interfacial layer of  $\text{Au}_{25}^+$ . (b) The charge distribution of the GV<sub>6</sub>-1 substrate and the interfacial atoms of  $\text{Au}_{25}^+$  during equilibrium AIMD simulations.

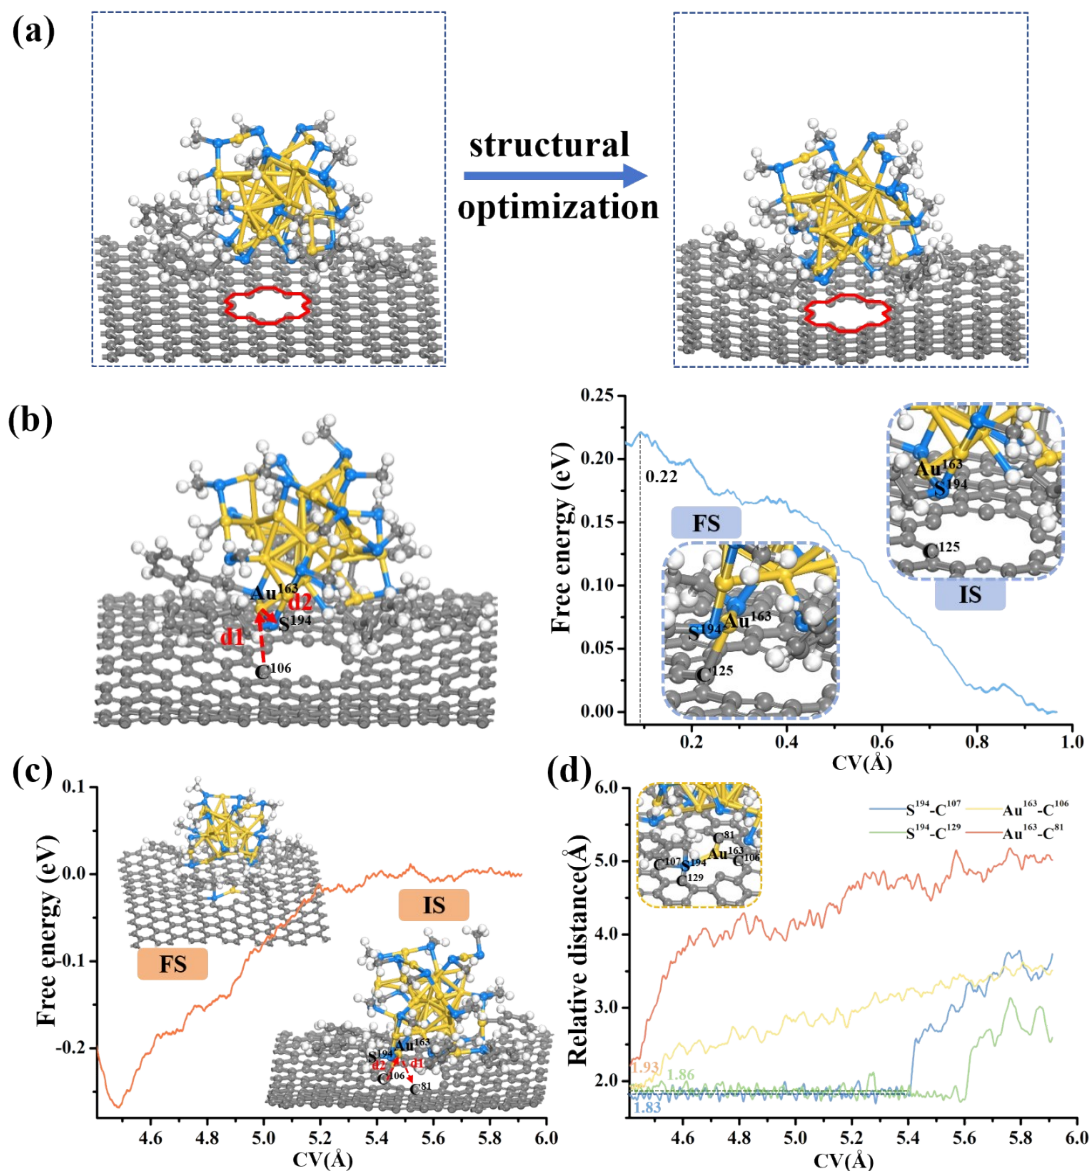

Figure S12. (a) The structural model of Au<sub>25</sub>(SR)<sub>18</sub> (-SR at the interface is -SC<sub>2</sub>H<sub>4</sub>Ph) NC loaded on GV<sub>6</sub>-1 and the optimized structure. (b) The integral free energy curve of Au<sub>25</sub> approaching to GV<sub>6</sub>-1. The collective variable (CV) is defined as d<sub>1</sub>-d<sub>2</sub>. (c) The integral free energy curve and (d) the relative distance between representative atoms for the removal of the Au-SR unit from Au<sub>25</sub>. The collective variable (CV) is defined as d<sub>1</sub>+d<sub>2</sub>. IS and FS represent the initial and final structures.

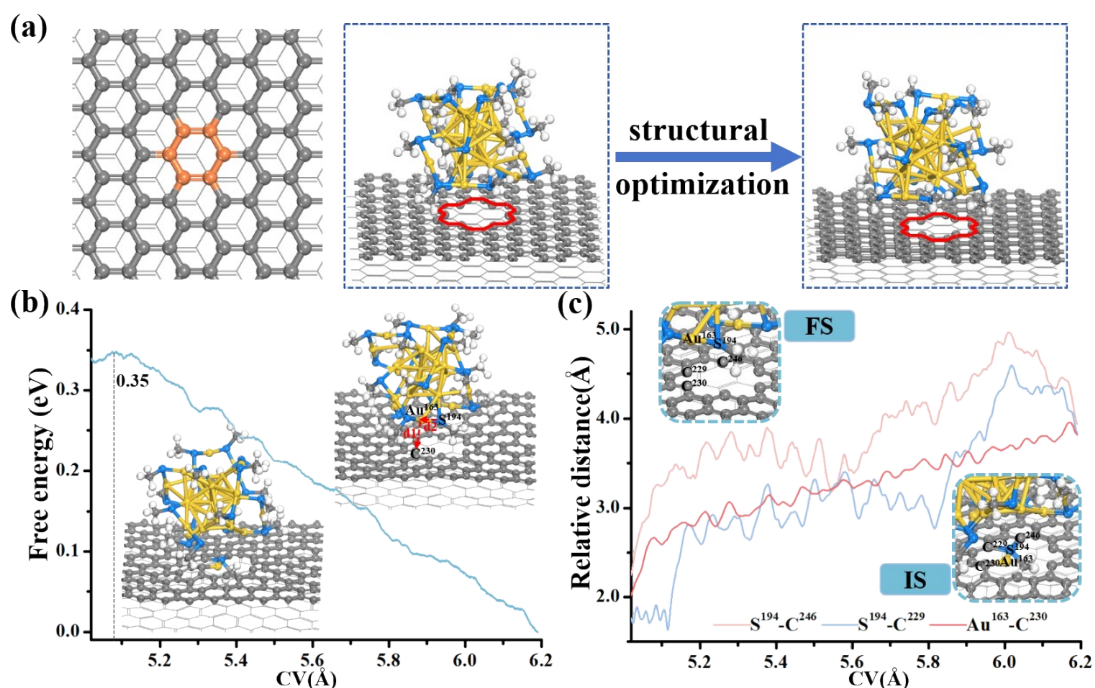

Figure S13. From left to right: the constructed bilayer graphene substrate with vacancy defects model (with the six removed C atoms shown in orange), the theoretical model of  $\text{Au}_{25}$  NC loaded on substrate and the optimized structure. (b) The integral free energy curve and (c) the relative distance between representative atoms for the removal of the Au-SR unit from  $\text{Au}_{25}$ . The collective variable (CV) is defined as  $d_1+d_2$ . IS and FS represent the initial and final structures.

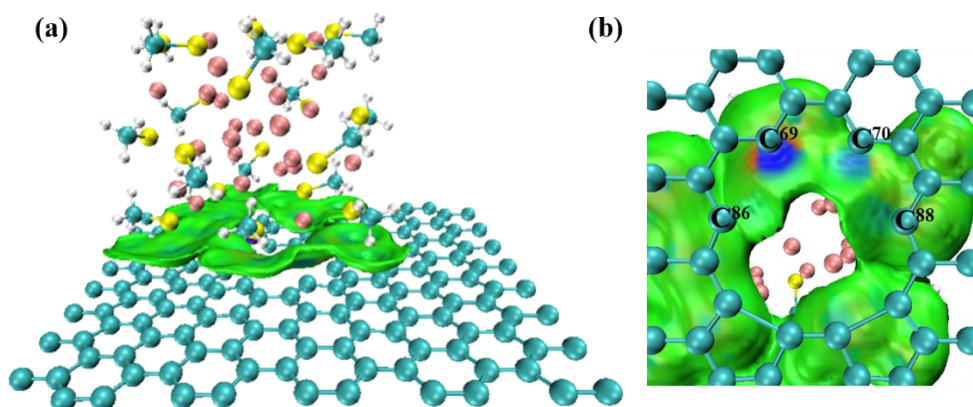

Figure S14. (a) The IGMH method visualization reveals the weak interaction between  $\text{Au}_{25}$  and  $\text{GV}_8$ . (b) Local interaction of the interface atoms between  $\text{Au}_{25}$  and the vacancy defect edges of  $\text{GV}_8$ .

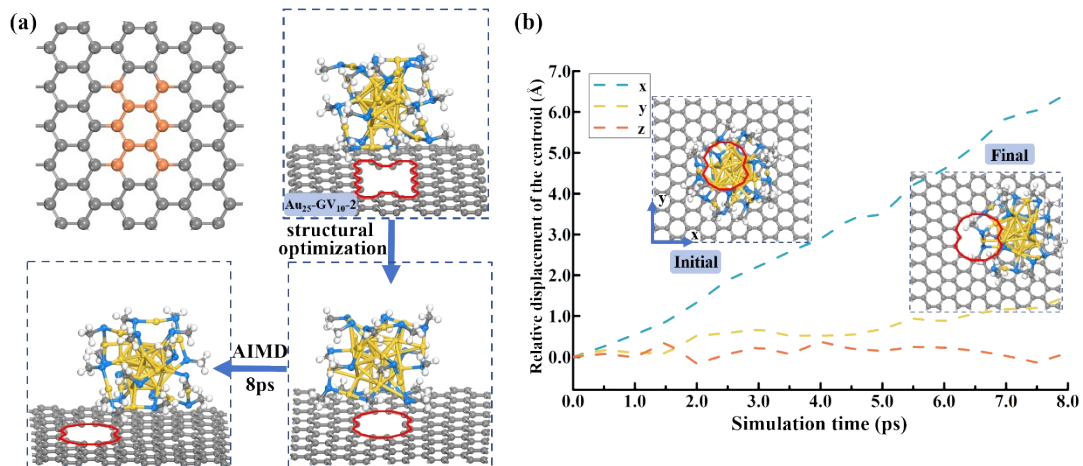

Figure S15. (a) The constructed GV<sub>10</sub>-2 model (with the ten removed C atoms shown in orange), the theoretical model of Au<sub>25</sub> NCs loaded on the GV<sub>10</sub>-2 substrate, the optimized structure and the snapshot after 8ps AIMD simulations at 300K. (b) Displacement of Au<sub>25</sub> NC on GV<sub>10</sub>-2 along the x, y, and z axes at 300K, with the AIMD snapshots of the initial and final structures shown inset.

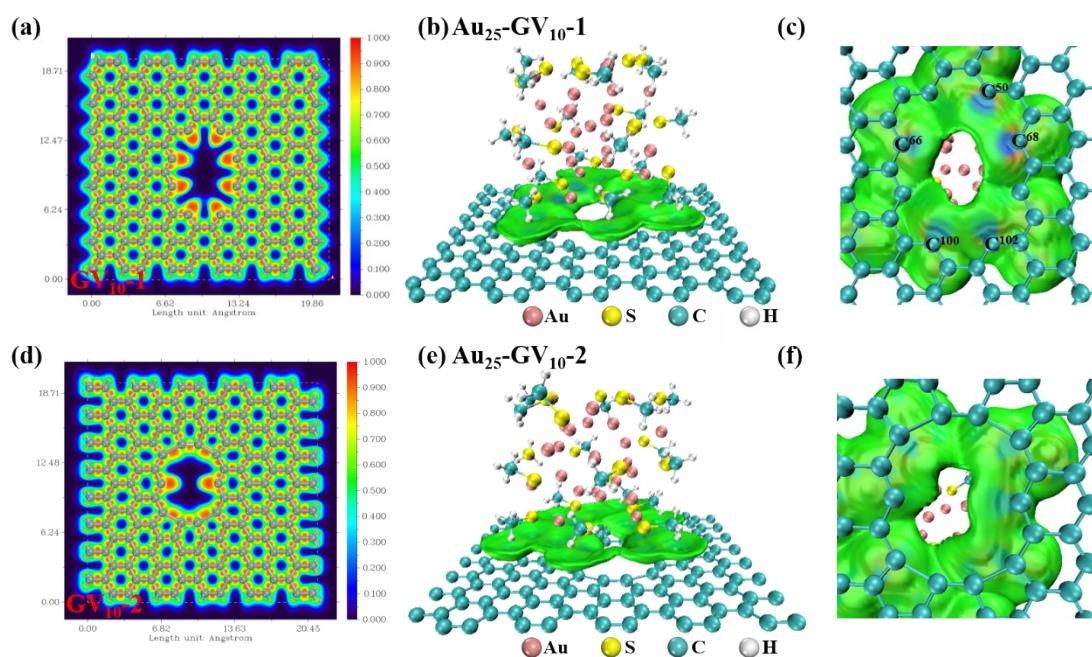

Figure S16. The ELF analysis on the electronic distribution of GV<sub>10</sub>-1(a) and GV<sub>10</sub>-2(d). The IGMH method visualization reveals the interactions between Au<sub>25</sub> and GV<sub>10</sub>-1(b) and GV<sub>10</sub>-2(e). Local interaction of the interface atoms between Au<sub>25</sub> and the vacancy defect edges of GV<sub>10</sub>-1 (c) and GV<sub>10</sub>-2 (f).

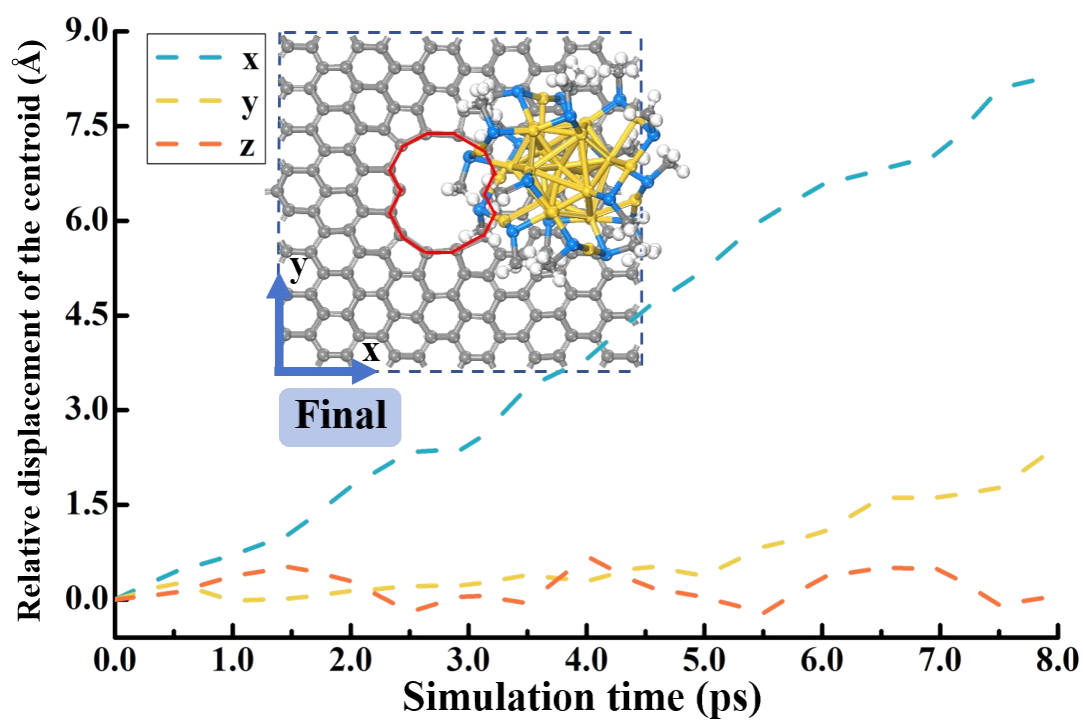

Figure S17. Displacement of  $\text{Au}_{25}$  NC on  $\text{GV}_{10-2}$  along the direction of x, y, and z axes at 600K. The AIMD snapshot of the final state after 8 ps simulations is shown inset.

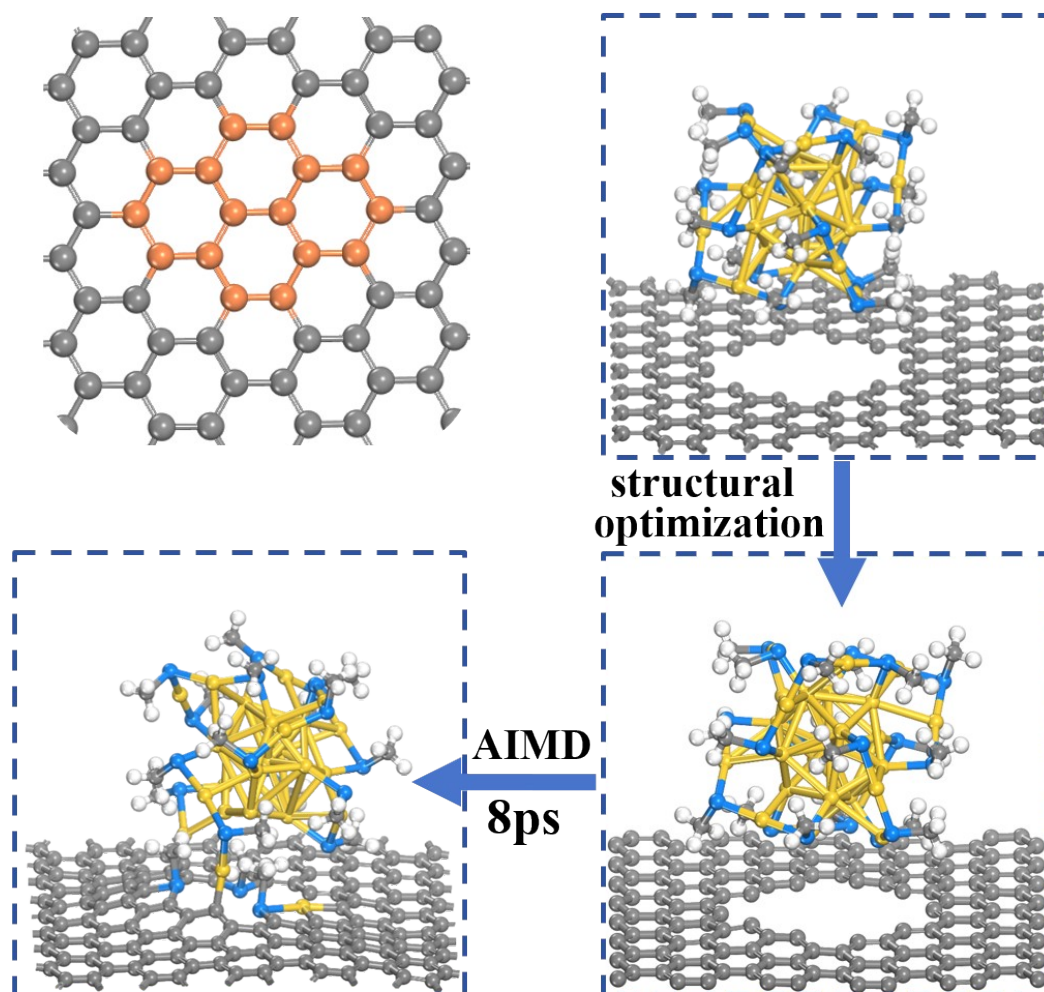

Figure S18. The constructed GV<sub>16</sub> model (with the 16 removed C atoms shown in orange), the theoretical model of Au<sub>25</sub> NCs loaded on the GV<sub>16</sub> substrate, the optimized structure and the snapshot after 8ps AIMD simulations at 300K.

(a) standard  $\text{Au}_{25}$

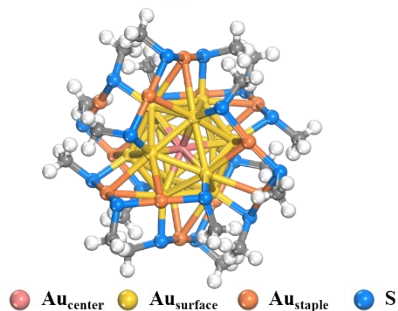

(b)  $\text{Au}_{25}\text{-GV}_6\text{-1}$  in vacuum

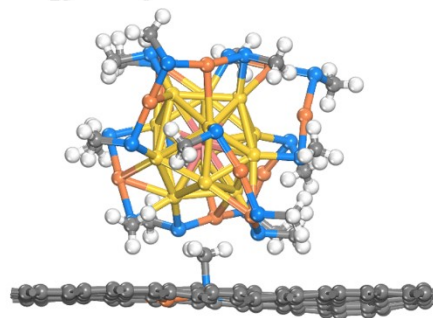

(c)  $\text{Au}_{25}\text{-GV}_6\text{-1}$  in solution

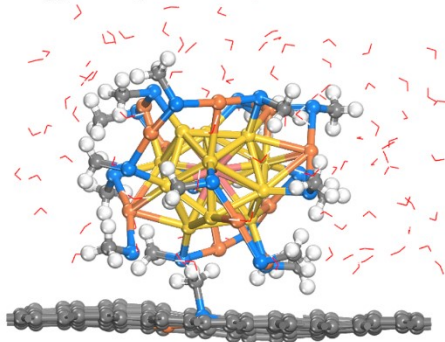

(d)  $\text{Au}_{25}\text{-GV}_6\text{-1}$  after CO desorption

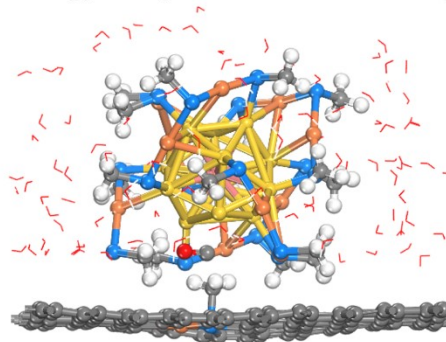

(e)

|                                                         | standard $\text{Au}_{25}$ | $\text{Au}_{25}\text{-GV}_6\text{-1}$<br>in vacuum | $\text{Au}_{25}\text{-GV}_6\text{-1}$<br>in solution | $\text{Au}_{25}\text{-GV}_6\text{-1}$<br>after CO desorption |
|---------------------------------------------------------|---------------------------|----------------------------------------------------|------------------------------------------------------|--------------------------------------------------------------|
| $\text{Au}_{\text{center}}\text{-Au}_{\text{surface}}$  | 2.83                      | 2.95                                               | 2.93                                                 | 2.89                                                         |
| $\text{Au}_{\text{surface}}\text{-Au}_{\text{surface}}$ | 2.98                      | 3.10                                               | 3.08                                                 | 3.05                                                         |
| $\text{Au}_{\text{surface}}\text{-S}$                   | 2.39                      | 2.45                                               | 2.47                                                 | 2.46                                                         |
| $\text{Au}_{\text{staple}}\text{-S}$                    | 2.32                      | 2.35                                               | 2.38                                                 | 2.37                                                         |

Figure S19. The structures of (a) standard  $\text{Au}_{25}$ , (b)  $\text{Au}_{25}\text{-GV}_6\text{-1}$  in vacuum, (c)  $\text{Au}_{25}\text{-GV}_6\text{-1}$  in solution and (d)  $\text{Au}_{25}\text{-GV}_6\text{-1}$  after CO desorption as well as the average Au-Au bond lengths and Au-S bond lengths in the corresponding structures (e).

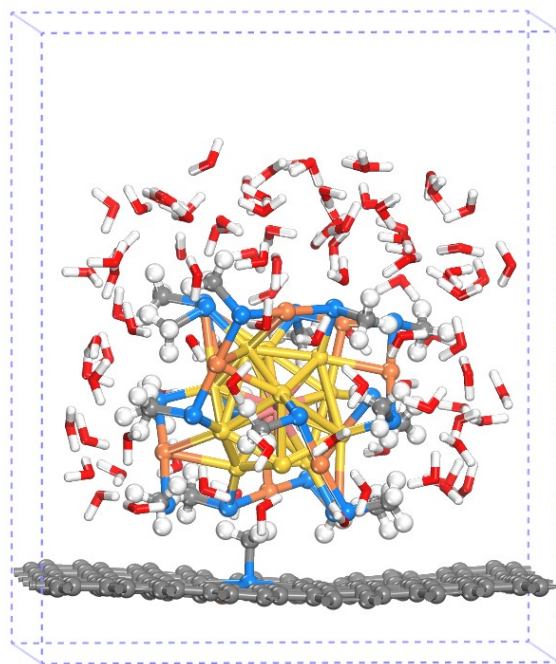

Figure S20. Schematic of the computational model containing etched Au<sub>25</sub>-GV<sub>6</sub>-1 system and 97 H<sub>2</sub>O molecules. For clarity, all H<sub>2</sub>O molecules are represented by stick modes.

Table S1. Bader charge analysis of Au atoms in Au<sub>25</sub>-GV<sub>6</sub>-1/water system after 8ps AIMD simulations at 300K.

| atom                               | Charge | Net Charge |
|------------------------------------|--------|------------|
| Au <sup>1</sup> <sub>surface</sub> | 10.966 | 0.034      |
| Au <sup>2</sup> <sub>surface</sub> | 10.972 | 0.028      |
| Au <sup>3</sup> <sub>surface</sub> | 10.961 | 0.039      |

|                                   |        |        |
|-----------------------------------|--------|--------|
| $\text{Au}^4_{\text{surface}}$    | 10.984 | 0.016  |
| $\text{Au}^5_{\text{surface}}$    | 11.000 | 0.000  |
| $\text{Au}^6_{\text{staple}}$     | 10.909 | 0.091  |
| $\text{Au}^7_{\text{staple}}$     | 10.928 | 0.072  |
| $\text{Au}^8_{\text{staple}}$     | 10.930 | 0.070  |
| $\text{Au}^9_{\text{staple}}$     | 10.646 | 0.354  |
| $\text{Au}^{10}_{\text{surface}}$ | 10.944 | 0.056  |
| $\text{Au}^{11}_{\text{staple}}$  | 10.950 | 0.050  |
| $\text{Au}^{12}_{\text{staple}}$  | 10.942 | 0.058  |
| $\text{Au}^{13}_{\text{surface}}$ | 10.934 | 0.066  |
| $\text{Au}^{14}_{\text{surface}}$ | 10.960 | 0.040  |
| $\text{Au}^{15}_{\text{surface}}$ | 10.969 | 0.031  |
| $\text{Au}^{16}_{\text{surface}}$ | 11.054 | -0.054 |
| $\text{Au}^{17}_{\text{surface}}$ | 10.972 | 0.028  |
| $\text{Au}^{18}_{\text{staple}}$  | 10.956 | 0.044  |
| $\text{Au}^{19}_{\text{staple}}$  | 10.907 | 0.093  |
| $\text{Au}^{20}_{\text{staple}}$  | 10.866 | 0.134  |
| $\text{Au}^{21}_{\text{staple}}$  | 10.869 | 0.131  |
| $\text{Au}^{22}_{\text{surface}}$ | 10.938 | 0.062  |
| $\text{Au}^{23}_{\text{staple}}$  | 10.935 | 0.065  |
| $\text{Au}^{24}_{\text{staple}}$  | 10.923 | 0.077  |
| $\text{Au}^{25}_{\text{center}}$  | 11.012 | -0.012 |

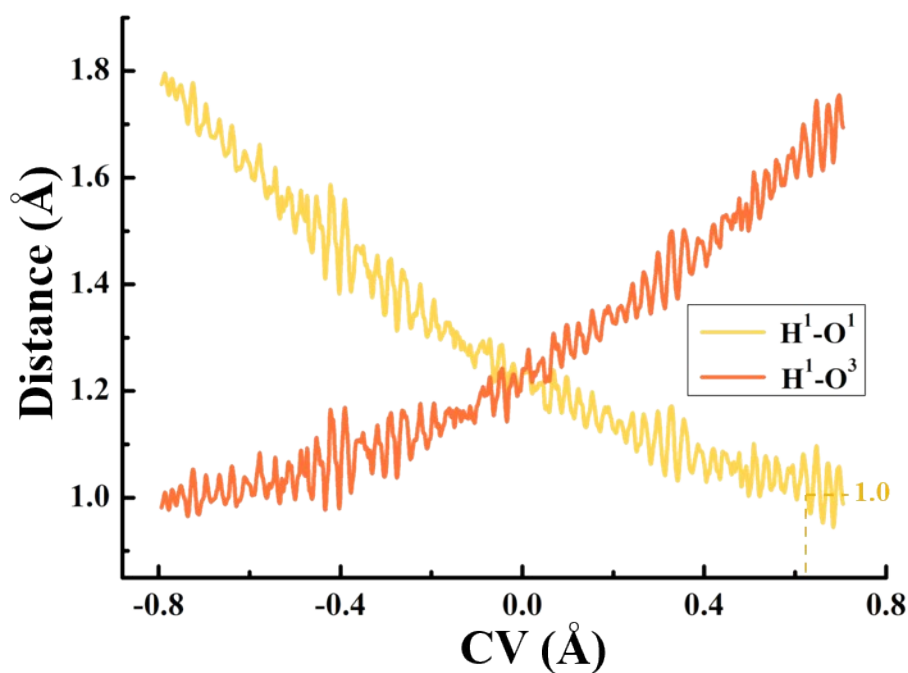

Figure S21. Critical H-O distances in H<sub>2</sub>O molecules providing proton (orange line) and distance between the H of this H<sub>2</sub>O and the O of \*CO<sub>2</sub> (H-O, yellow line) during the \*COOH formation.

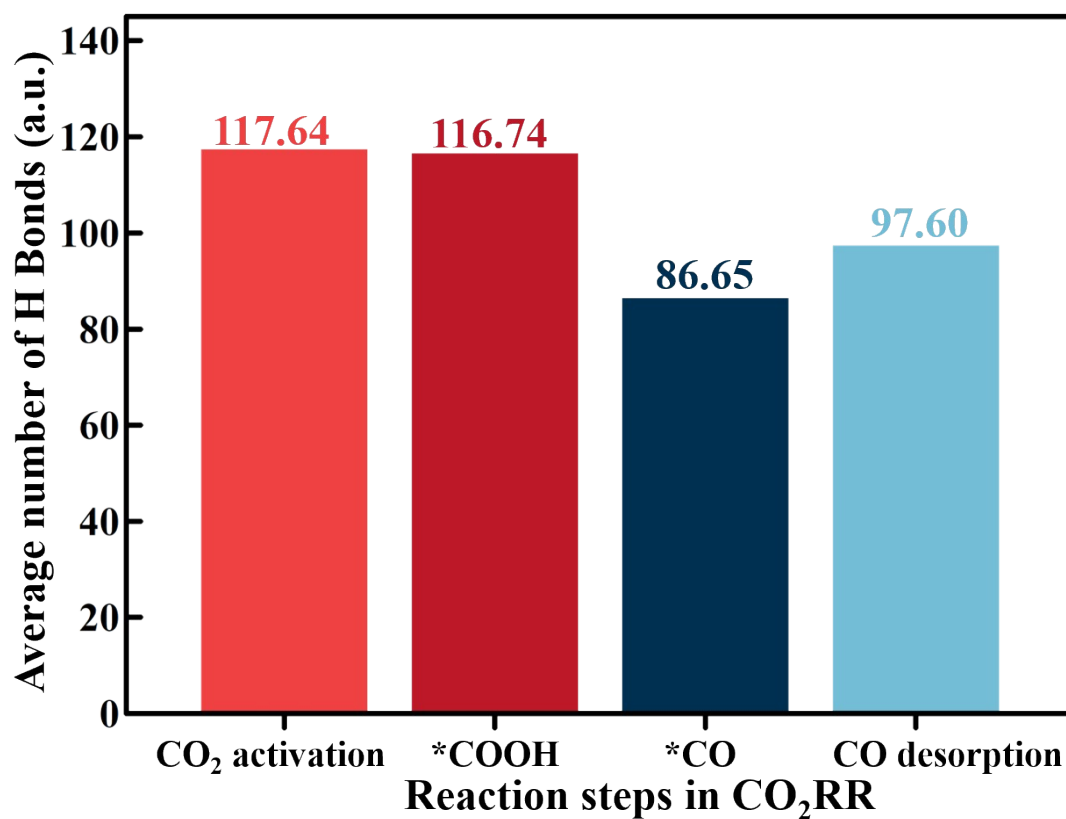

Figure S22. The number of hydrogen bonds for the etched Au<sub>25</sub>-GV<sub>6</sub>-1 system at different reaction steps of CO<sub>2</sub>RR (\*CO<sub>2</sub> activation, \*COOH formation, \*CO formation and CO desorption).
